# Supplementary material for: Dynamic Properties of Di(cyclopentadienecarboxylic Acid) Dimethyl Esters
Source: MDPI journal article supplement (doi:10.3390/ijms241914980), 2023-10-07
Supplement: s1 [file s1]

# Dynamic Properties of Di(cyclopentadienecarboxylic Acid) Dimethyl Esters

Alojz Anžlovar \*, Damjan Jan Pavlica, David Pahovnik, Ema Žagar

Department of Polymer Chemistry and Technology, National Institute of Chemistry, Hajdrihova 19, SI-1000 Ljubljana, Slovenia

\* Correspondence: e-mail: [alozjz.anzlovar@ki.si](mailto:alozjz.anzlovar@ki.si); Tel.: +386-1-4760-204

## Supplementary Materials

### The procedure for the GC-MS study of DCPDME – isomer 3 decomposition into cyclopentadienecarboxylic acid methyl ester

The SPME fiber holder for manual use and 75  $\mu\text{m}$  carboxen-polydimethylsiloxane (CAR/PDMSE) fiber from Supelco (Bellefonte, PA, USA) were used for extraction. The fiber was conditioned at 200 °C for 20 minutes. Twenty-milliliter glass vials containing an aluminium-coated silicone rubber septum (Agilent, Santa Clara, CA, USA) were used. A Kambič SP-120 oven (Semič, Slovenia) was used at 110 °C for sample extraction.

Approximately 1 mg of the solid sample of isomer 3 was sealed in a 20-mL vial. The septum of the vial was pierced with the needle of the SPME device and the fiber was exposed about 1 cm above the sample. The vial with the SPME injector was then placed in the oven at 110 °C for 10 minutes. The fiber was then retracted into the protective sleeve and removed from the HS vial. It was transferred to the injection port of the GC/MS without delay. The fiber was thermally desorbed in the injection port at 160 °C for 10 s, and the GC/MS run was started. The HP-5MS fused silica GC capillary column, 30 m long, 0.25 mm I.D., with 0.25  $\mu\text{m}$  film thickness (Agilent, Santa Clara, CA, USA) was used for chromatographic separation. Helium was used as the carrier gas with a constant flow of 1.0 mL/min. The gas chromatographic conditions were as follows: programmed temperature of the capillary column from 60 °C (2 min hold) at 10 °C/min to 100 °C and at 20 °C/min to 180 °C; split/splitless injector temperature was 160 °C; split ratio was 50:1 and transfer line temperature was 200 °C. The temperature of the EI ion source was maintained at 230 °C. Ionization was performed with a kinetic energy of the impacting electrons of 70 eV. The quadrupole temperature was 150 °C. Mass spectra and reconstructed chromatograms (TIC) were obtained by automated scanning in the mass range  $m/z$  from 12 to 350 amu. GC/MS data were processed using *ChemStation* software (Agilent, Santa Clara, CA, USA).

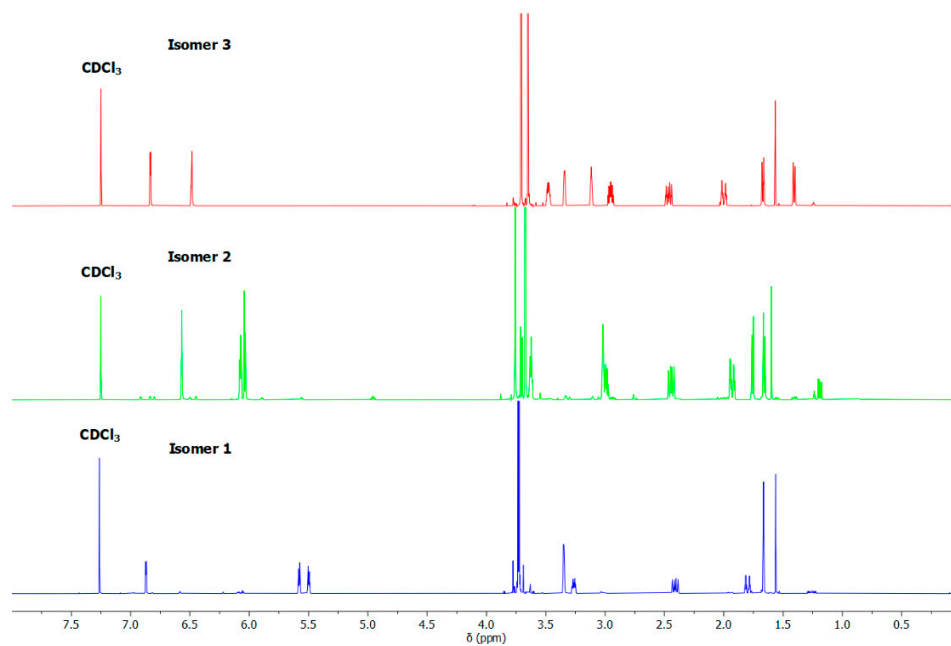

**Figure S1.**  $^1\text{H}$  NMR spectra of all three DCPDME isomers in  $\text{CDCl}_3$ .

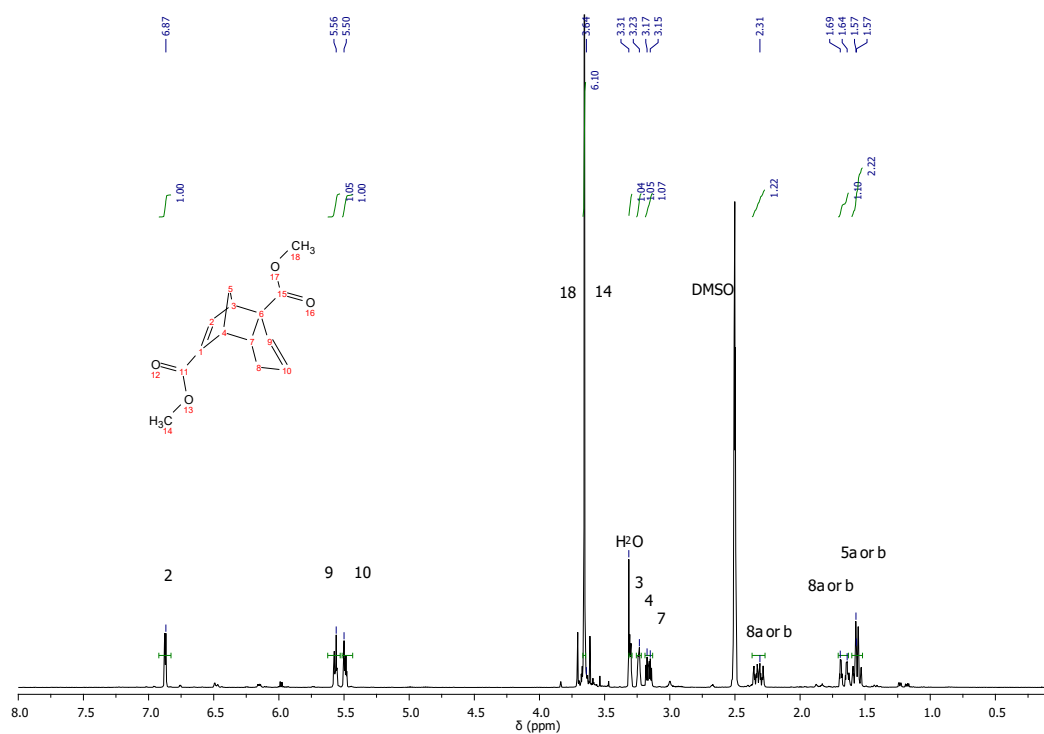

**Figure S2.**  $^1\text{H}$  NMR spectrum of DCPDME isomer 1 in  $\text{DMSO}-d_6$ .

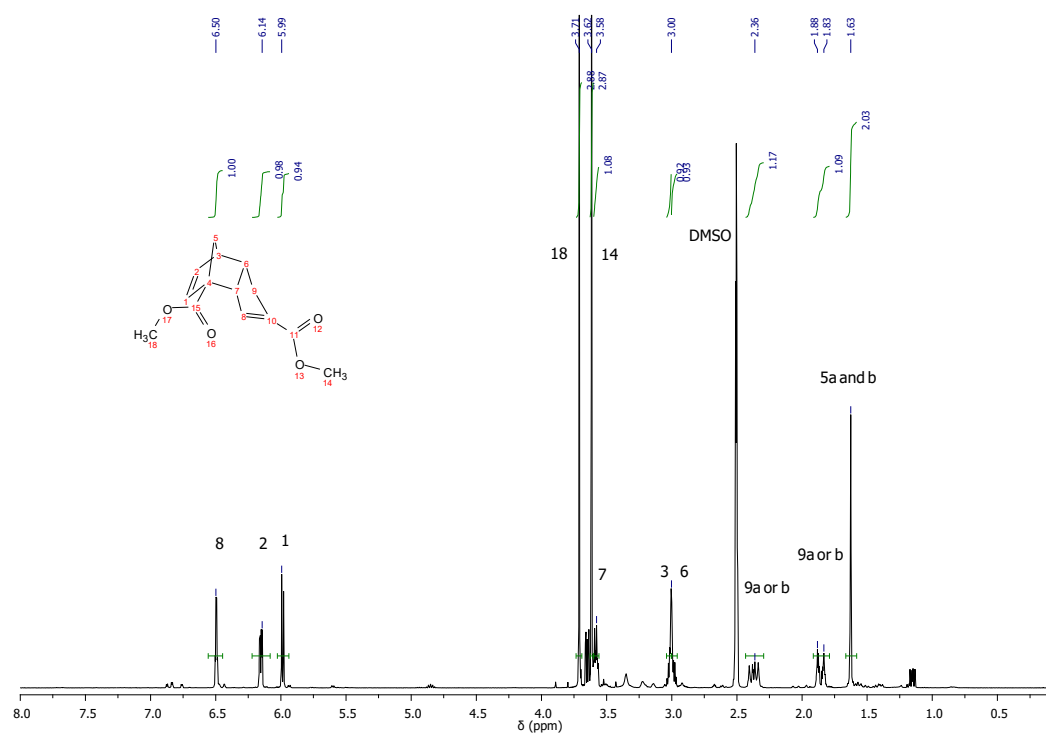

**Figure S3.** <sup>1</sup>H NMR spectrum of DCPDME isomer 2 in DMSO-*d*<sub>6</sub>.

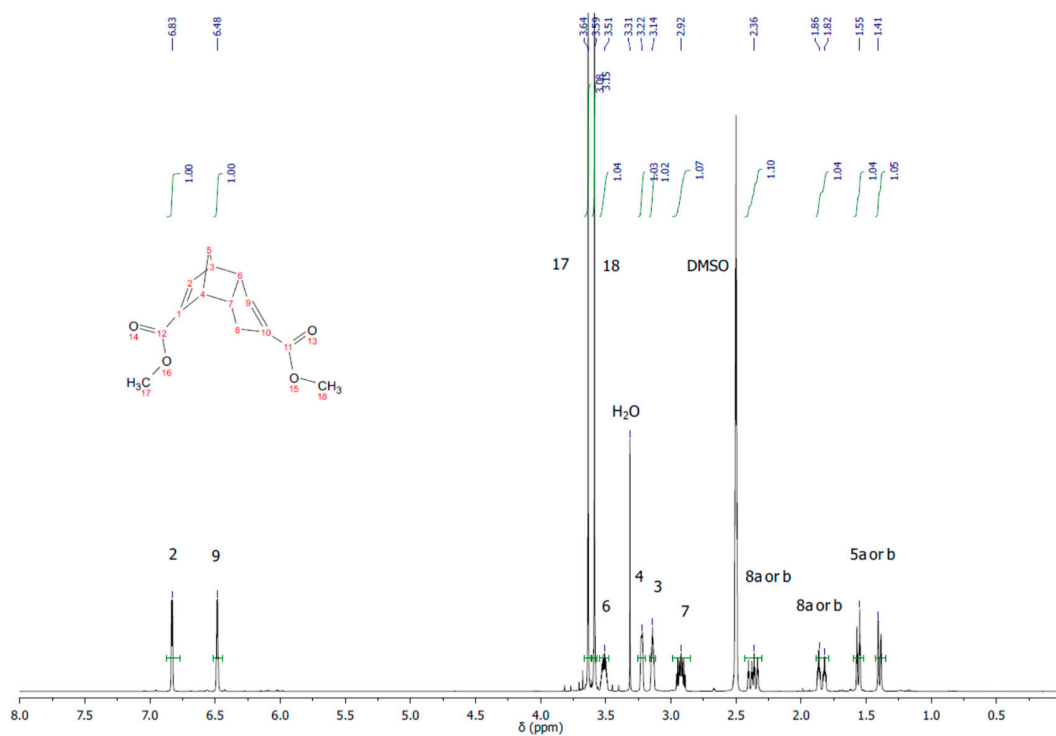

**Figure S4.** <sup>1</sup>H NMR spectrum of DCPDME isomer 3 in DMSO-*d*<sub>6</sub>.

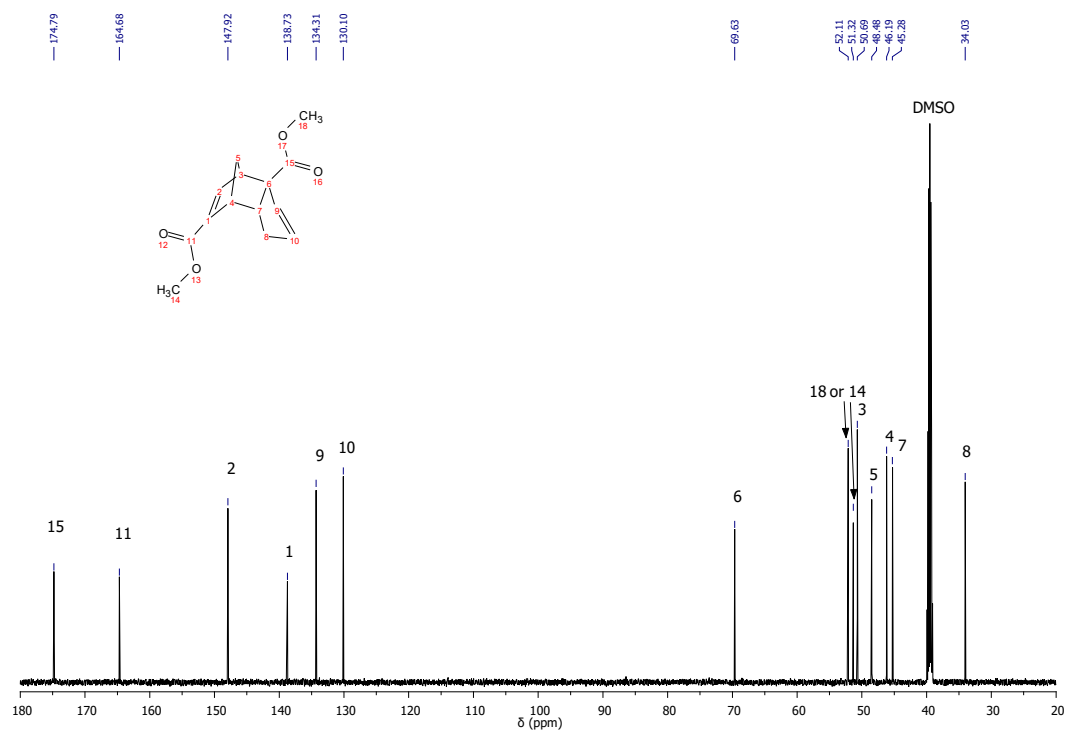

**Figure S5.**  $^{13}\text{C}$  NMR spectrum of DCPDME isomer 1 in  $\text{DMSO}-d_6$ .

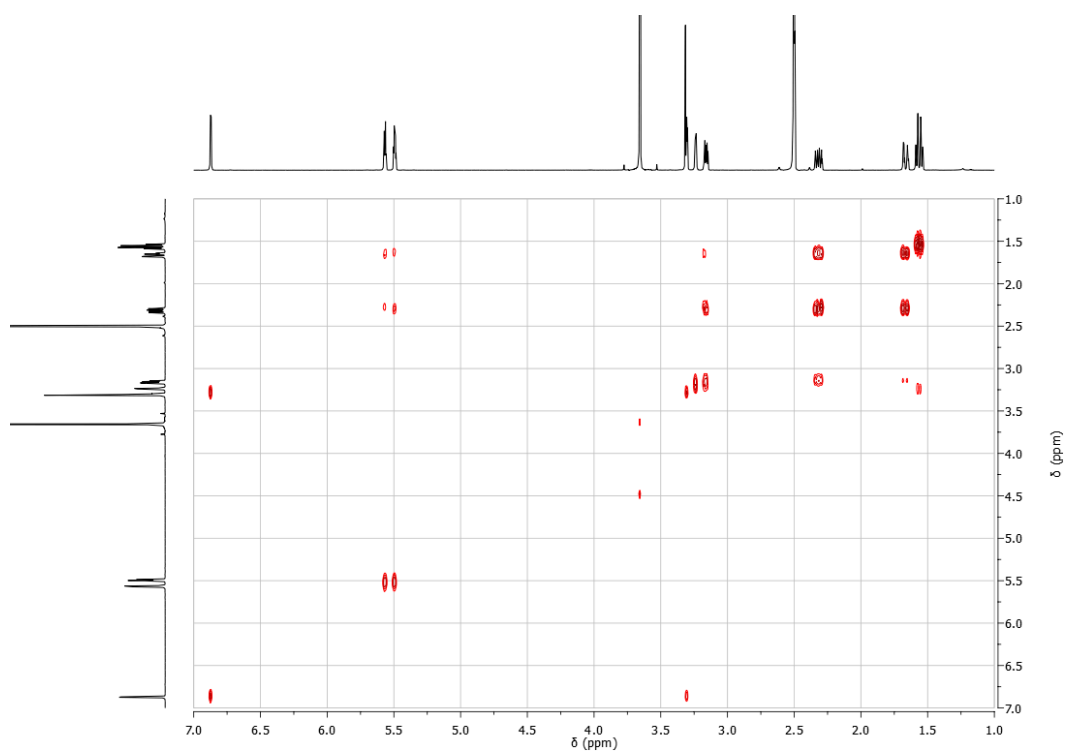

**Figure S6.** COSY NMR spectrum of DCPDME isomer 1 in  $\text{DMSO}-d_6$ .

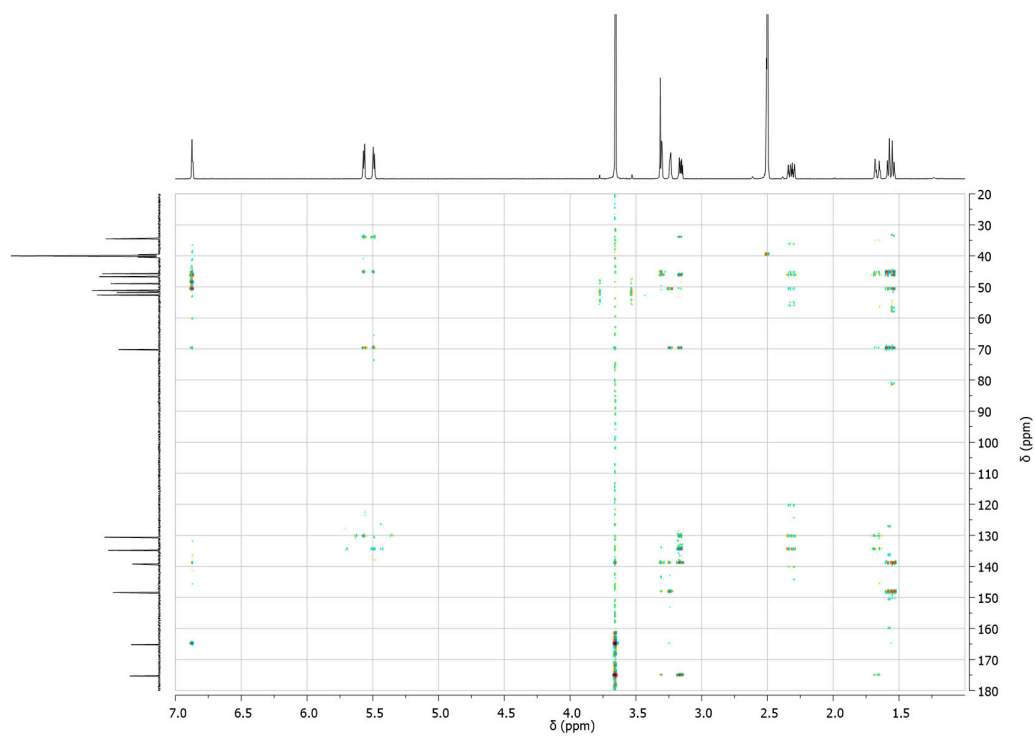

**Figure S7.** HMBC NMR spectrum of DCPDME isomer 1 in DMSO- $d_6$ .

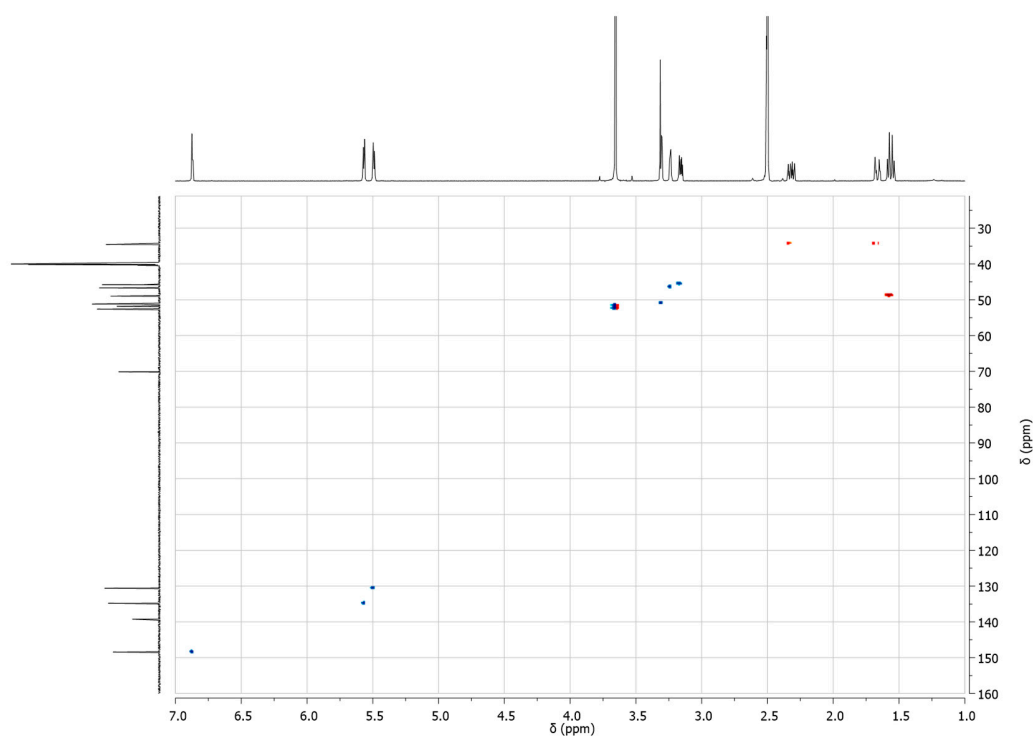

**Figure S8.** HSQC NMR spectrum of DCPDME isomer 1 in DMSO- $d_6$ .

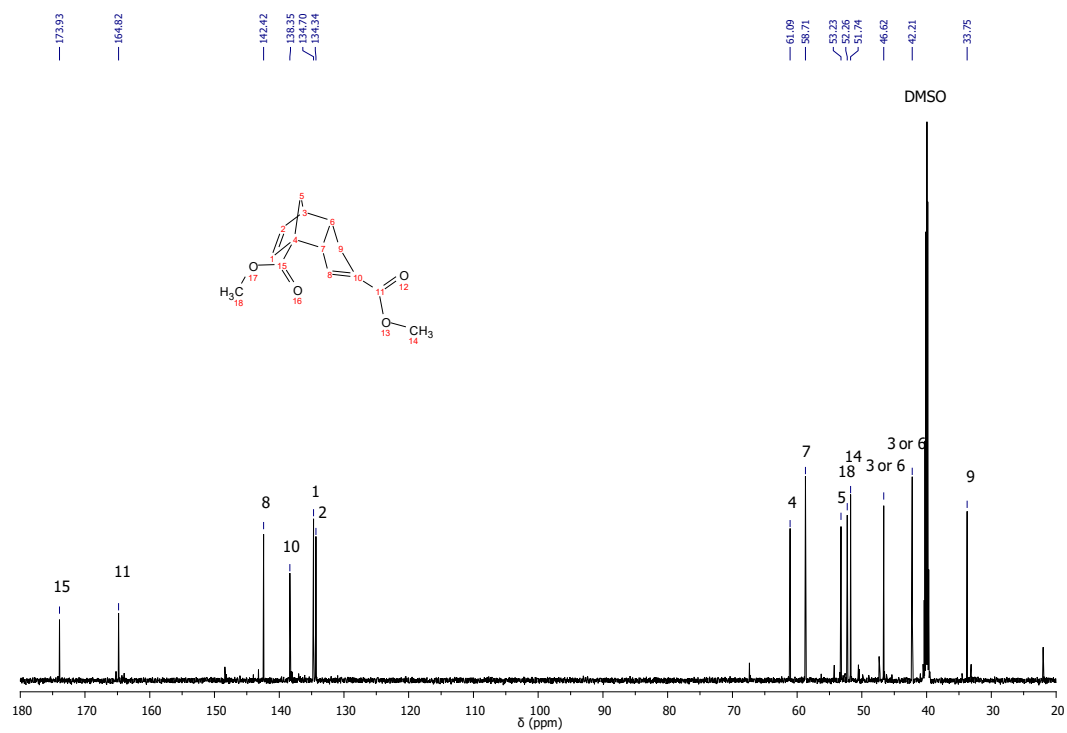

**Figure S9.**  $^{13}\text{C}$  NMR spectrum of DCPDME isomer 2 in  $\text{DMSO}-d_6$ .

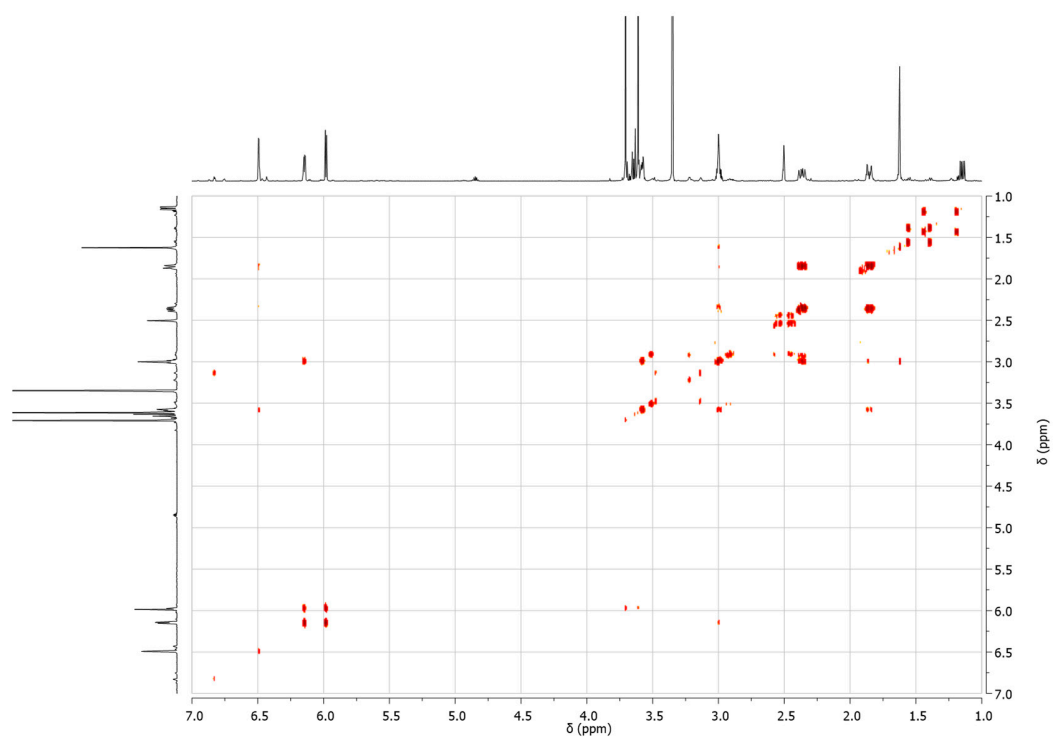

**Figure S10.** COSY NMR spectrum of DCPDME isomer 2 in  $\text{DMSO}-d_6$ .

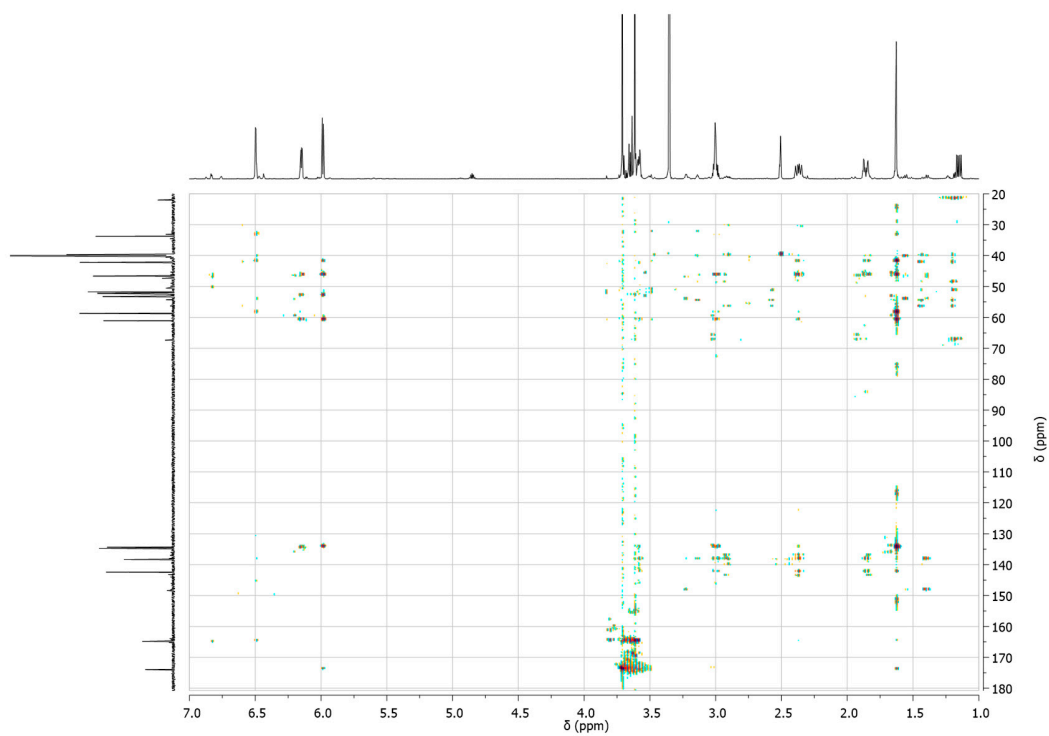

**Figure S11.** HMBC NMR spectrum of DCPDME isomer 2 in DMSO- $d_6$ .

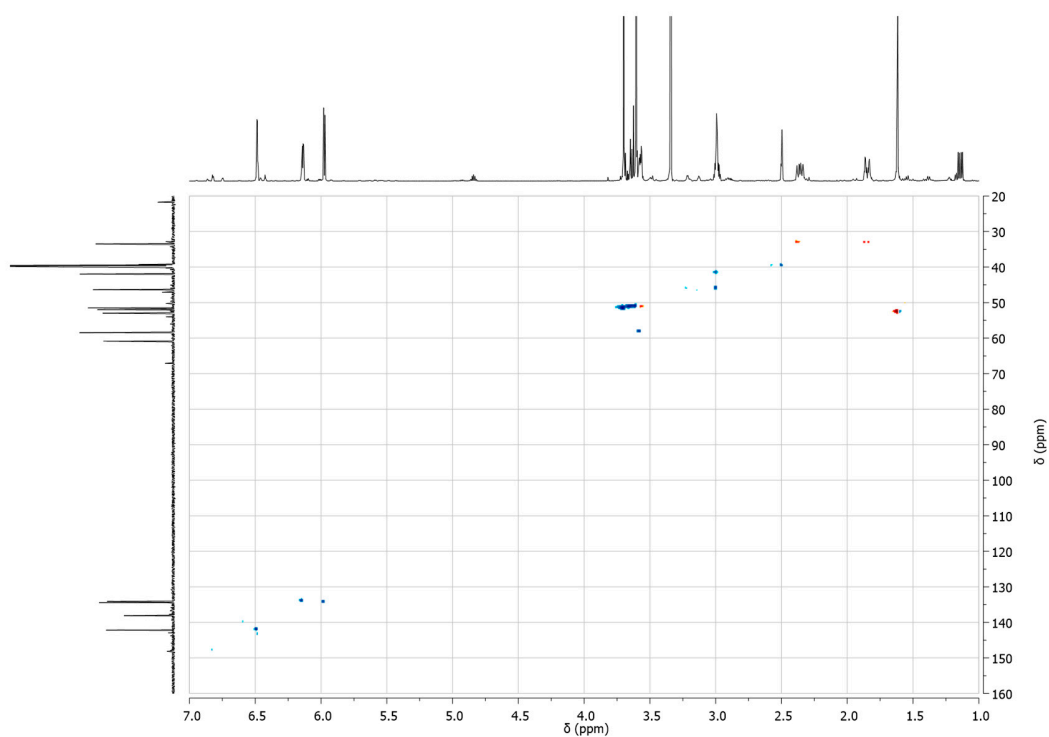

**Figure S12.** HSQC NMR spectrum of DCPDME isomer 2 in DMSO- $d_6$ .

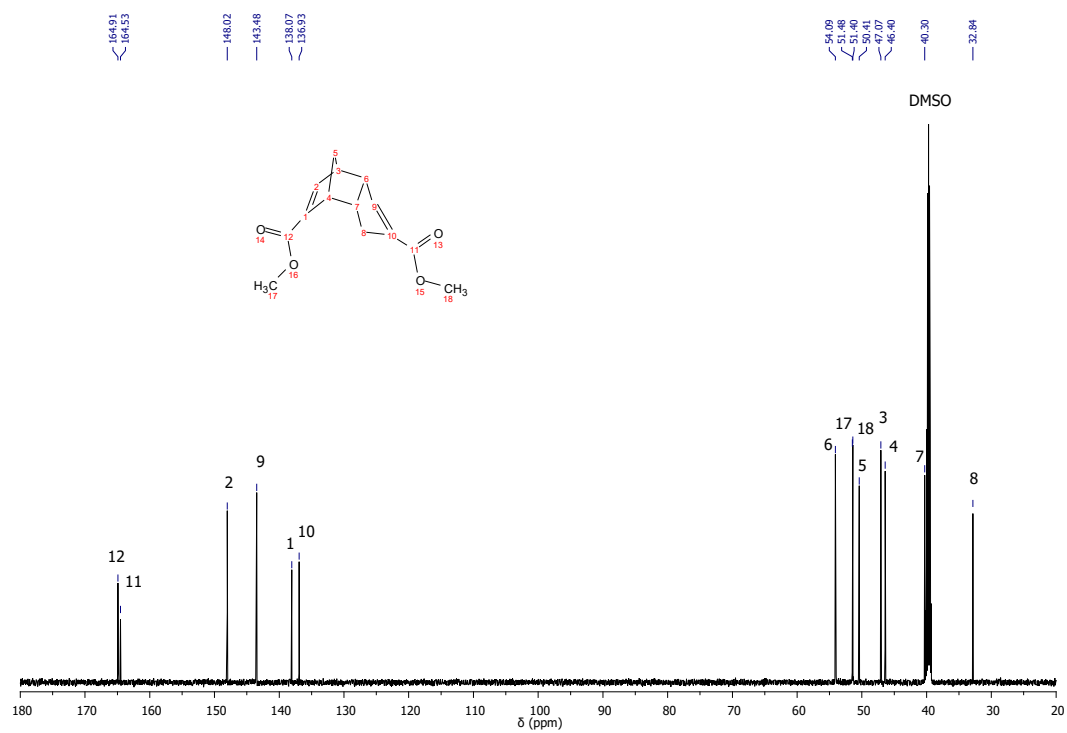

**Figure S13.**  $^{13}\text{C}$  NMR spectrum of DCPDME isomer 3 in  $\text{DMSO}-d_6$ .

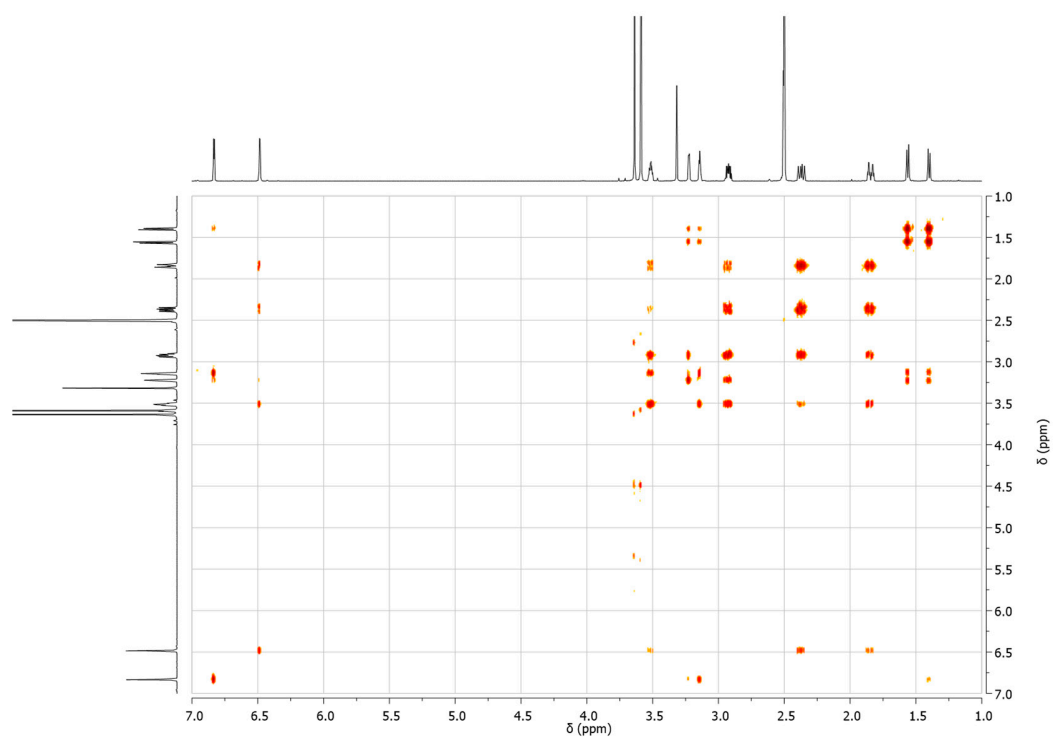

**Figure S14.** COSY NMR spectrum of DCPDME isomer 3 in  $\text{DMSO}-d_6$ .



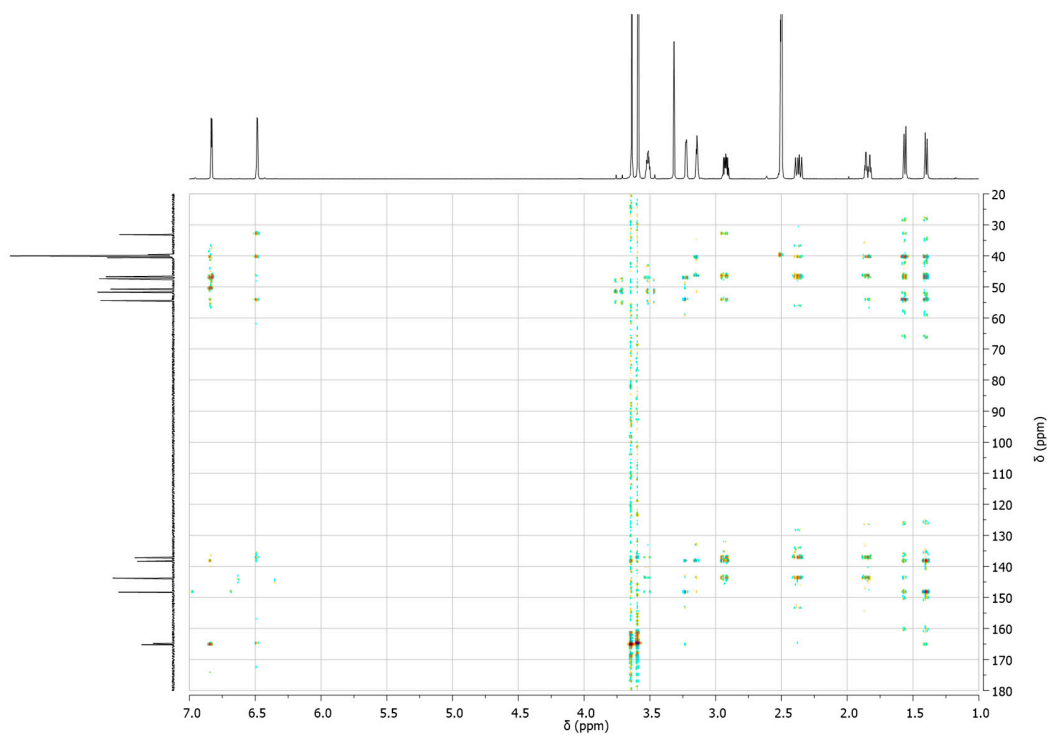

**Figure S15.** HMBC NMR spectrum of DCPDME isomer 3 in DMSO- $d_6$ .

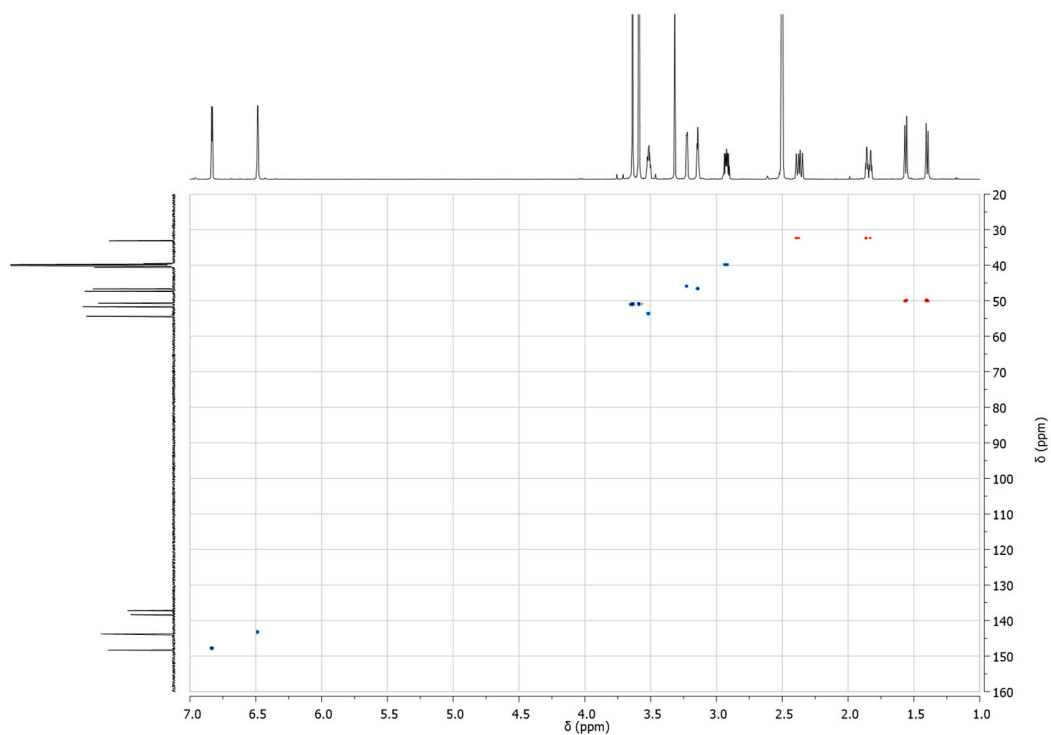

**Figure S16.** HSQC NMR spectrum of DCPDME isomer 3 in DMSO- $d_6$ .

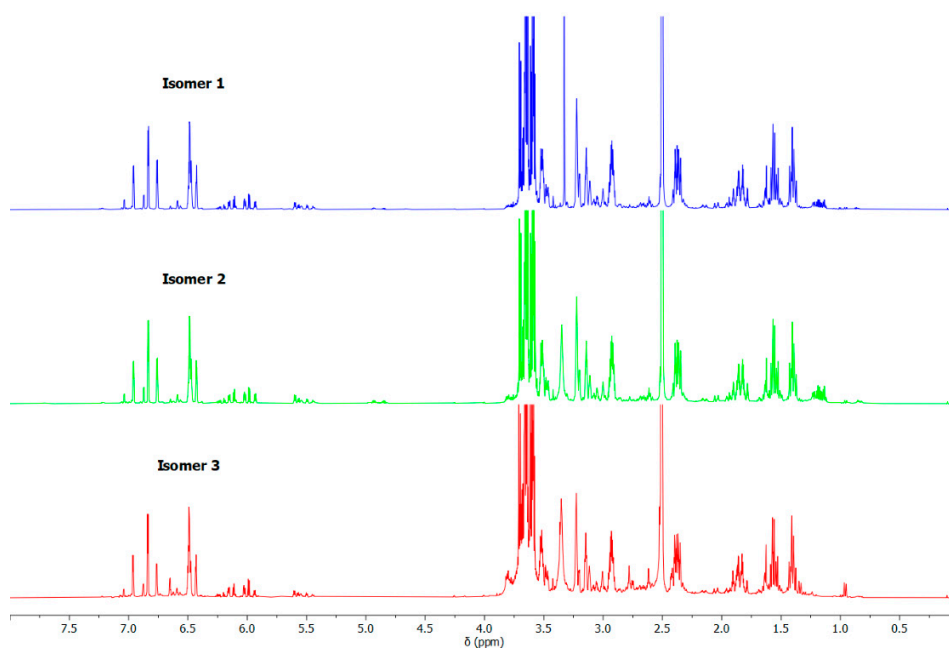

**Figure S17.**  $^1\text{H}$  NMR spectra of all three DCPDME isomers after heating to 180 °C for 2 minutes in  $\text{N}_2$  in DSC calorimeter.

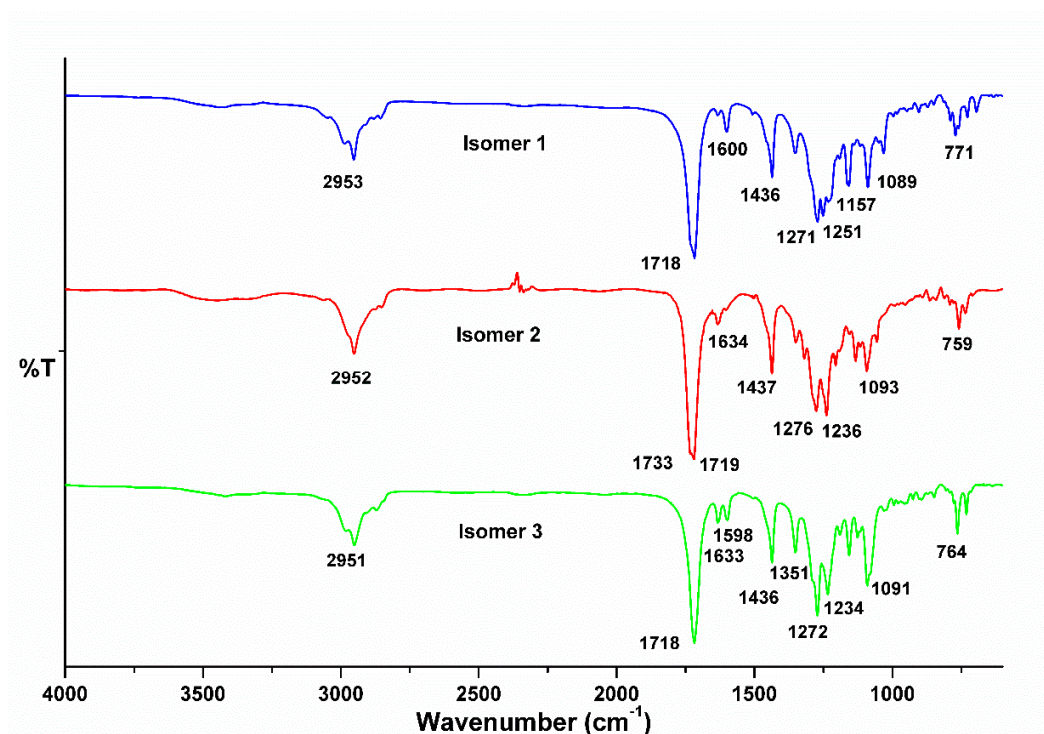

**Figure S18.** FTIR spectra of all three DCPDME isomers at 125 °C.

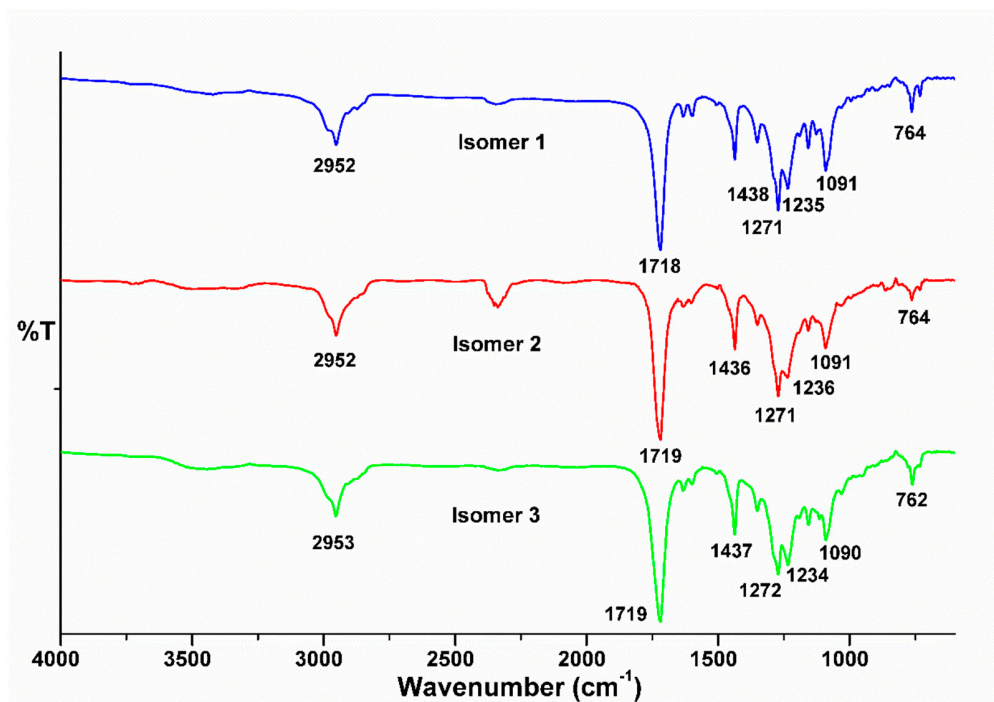

**Figure S19.** FTIR spectra of all three DCPDME isomers at 140 °C.
